# Supplementary material
Source: MDPI journal article supplement (https://www.mdpi.com/2075-163X/13/7/862)
Supplement: s1 [file s1]

## Supplementary Materials

**Table S1.** Concentration of Dy, Nd, Pr, Tb and Fe in solutions after leaching of magnets in a laboratory scale with HCl solution and in solutions after precipitation of rare earth oxalates.

| Solution                | Concentration [g·L <sup>-1</sup> ] |      |       |       |      |
|-------------------------|------------------------------------|------|-------|-------|------|
|                         | Dy                                 | Nd   | Pr    | Tb    | Fe   |
| After I leaching        | 1.64                               | 20.3 | 1.23  | 0.150 | 64.8 |
| After I precipitation   | 0.233                              | 1.23 | 0.851 | 0.011 | 62.6 |
| After II leaching       | 2.84                               | 26.0 | 0.962 | 0.192 | 90.0 |
| After II precipitation  | 0.129                              | 1.15 | 0.032 | 0.012 | 63.2 |
| After III leaching      | 1.30                               | 18.0 | 1.57  | 0.120 | 98.4 |
| After III precipitation | 0.067                              | 0.91 | 0.096 | 0.007 | 81.8 |
| After IV leaching       | 1.40                               | 16.0 | 1.42  | 0.100 | 114  |
| After IV precipitation  | 0.151                              | 2.08 | 0.192 | 0.010 | 104  |

**Table S2.** Concentration of Dy, Nd, Pr and Tb in solutions after leaching and after precipitation of lanthanide oxalates in a larger laboratory scale. Three samples from each solution were analysed with ICP-OES technique. The numbers in the table represent the average concentrations.

| Solution                | Concentration [g·L <sup>-1</sup> ] |               |               |               |
|-------------------------|------------------------------------|---------------|---------------|---------------|
|                         | Dy                                 | Nd            | Pr            | Tb            |
| After I leaching        | 0.60 ± 0.06                        | 13.7 ± 0.7    | 1.27 ± 0.19   | 0.141 ± 0.013 |
| After I precipitation   | 0.016 ± 0.001                      | 0.270 ± 0.010 | 0.032 ± 0.003 | 0.005 ± 0.001 |
| After II leaching       | 0.55 ± 0.01                        | 10.8 ± 0.4    | 1.14 ± 0.01   | 0.086 ± 0.006 |
| After II precipitation  | 0.032 ± 0.005                      | 0.53 ± 0.06   | 0.07 ± 0.01   | 0.006 ± 0.001 |
| After III leaching      | 0.53 ± 0.03                        | 10.7 ± 0.4    | 1.25 ± 0.08   | 0.082 ± 0.002 |
| After III precipitation | 0.055 ± 0.006                      | 1.63 ± 0.08   | 0.21 ± 0.07   | 0.012 ± 0.004 |
| After IV leaching       | 0.61 ± 0.04                        | 15.5 ± 0.5    | 1.84 ± 0.13   | 0.137 ± 0.010 |
| After IV precipitation  | 0.03 ± 0.01                        | 0.79 ± 0.10   | 0.10 ± 0.04   | 0.006 ± 0.001 |

**Table S3.** Concentration of B, Co, Fe and Ni in solutions after leaching and after precipitation of lanthanide oxalates in a larger laboratory scale. Three samples from each solution were analysed with ICP-OES technique. The numbers in the table represent the average concentrations.

| Solution                | Concentration [g·L <sup>-1</sup> ] |             |             |               |
|-------------------------|------------------------------------|-------------|-------------|---------------|
|                         | B                                  | Co          | Fe          | Ni            |
| After I leaching        | 0.43 ± 0.04                        | 0.50 ± 0.13 | 33.6 ± 0.3  | 0.026 ± 0.003 |
| After I precipitation   | 0.45 ± 0.04                        | 0.60 ± 0.05 | 34.4 ± 1.4  | 0.027 ± 0.001 |
| After II leaching       | 0.83 ± 0.05                        | 1.16 ± 0.07 | 55.0 ± 1.24 | 0.036 ± 0.003 |
| After II precipitation  | 0.86 ± 0.03                        | 1.15 ± 0.19 | 56.8 ± 1.7  | 0.035 ± 0.004 |
| After III leaching      | 1.18 ± 0.15                        | 1.81 ± 0.08 | 83.5 ± 5.5  | 0.053 ± 0.002 |
| After III precipitation | 1.68 ± 0.03                        | 1.99 ± 0.41 | 86.6 ± 5.6  | 0.058 ± 0.009 |
| After IV leaching       | 1.71 ± 0.04                        | 2.10 ± 0.13 | 112 ± 4     | 0.062 ± 0.009 |
| After IV precipitation  | 1.25 ± 0.01                        | 1.88 ± 0.11 | 115 ± 1     | 0.052 ± 0.005 |
